# Supplementary material for: A dual-signal sensing system based on organic dyes-LDHs film for fluorescence detection of cysteine
Source: Royal Society of Chemistry journal article supplement (doi:10.1039/c7dt01555k), 2017-01-01
Supplement: c7dt01555k1.pdf [file c7dt01555k1.pdf]

## Supporting Information for A dual-signal sensing system based on organic dyes-LDHs film for fluorescence detection of cysteine

Mingzhe Li Yanyan Fu and Lan Jin\*

State Key Laboratory of Chemical Resource Engineering, Beijing University of Chemical  
Technology, Beijing 100029, China

\* Corresponding author. Tel: +86-10-64412131; Fax: +86-10-64425385.

E-mail address: jinlan@mail.buct.edu.cn (Lan Jin).

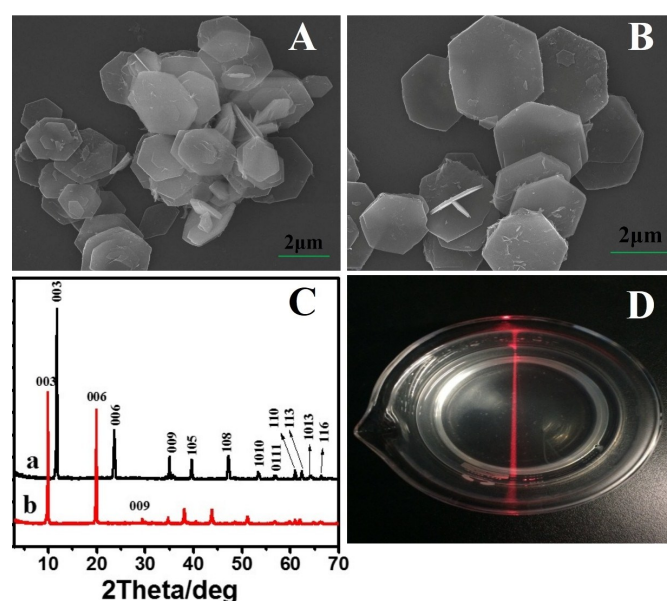

**Fig. S1** SEM images of (A) MgAl-CO<sub>3</sub>-LDH and (B) MgAl-NO<sub>3</sub>-LDH; (C) XRD patterns of MgAl-CO<sub>3</sub> LDH (a) and MgAl-NO<sub>3</sub> LDH (b); (D) The digital picture of MgAl-NO<sub>3</sub> colloidal suspension.

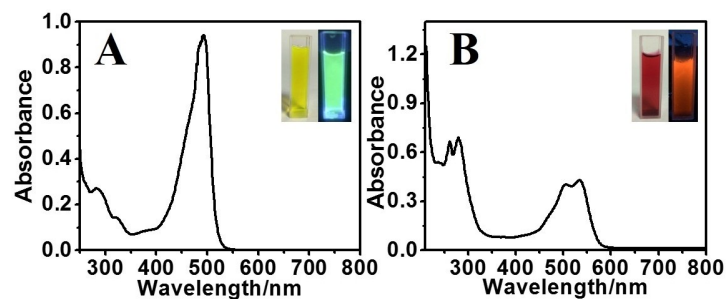

**Fig. S2** UV-vis absorption spectrum of (A) calcein and (B) NFR solution (inset: solution colors under daylight (left) and UV light (right), respectively).

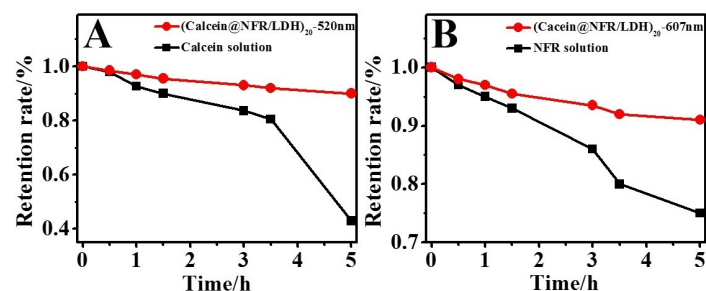

**Fig. S3** The fluorescence intensity change of (A) (calcein@NFR/LDH)<sub>20</sub> UTFs and calcein solution; (B) (calcein@NFR/LDH)<sub>20</sub> UTFs and NFR solution after exposure of ultraviolet lamp.

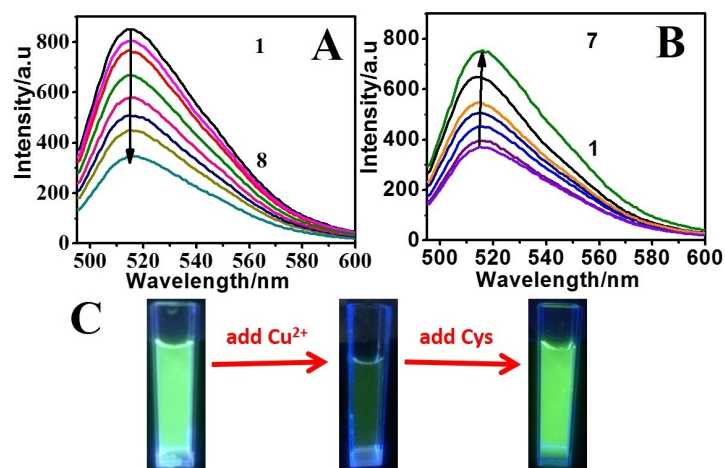

**Fig. S4** (A) Fluorescence spectra of calcein-Cu<sup>2+</sup> solution in Tris-HCl buffer of pH=6,  $C_{\text{calcein}}=1.0\times 10^{-4}$  M; The concentration of Cu<sup>2+</sup>: 0.0, 1.0, 2.0, 4.0, 8.0, 12.0, 24.0, 50.0 $\times 10^{-6}$  M, respectively; (B) Fluorescence spectra of calcein-Cu<sup>2+</sup> solution in the presence of Cys (1-7: 0.0, 2.0, 4.0, 10.0, 20.0, 40.0, 100.0 $\times 10^{-4}$  M). All samples were tested with  $\lambda_{\text{ex}}=490$  nm, slit width of 3nm; (C) The calcein solution, calcein-Cu<sup>2+</sup> solution and calcein-Cu<sup>2+</sup> solution in the presence of Cys under 365 nm UV illumination.

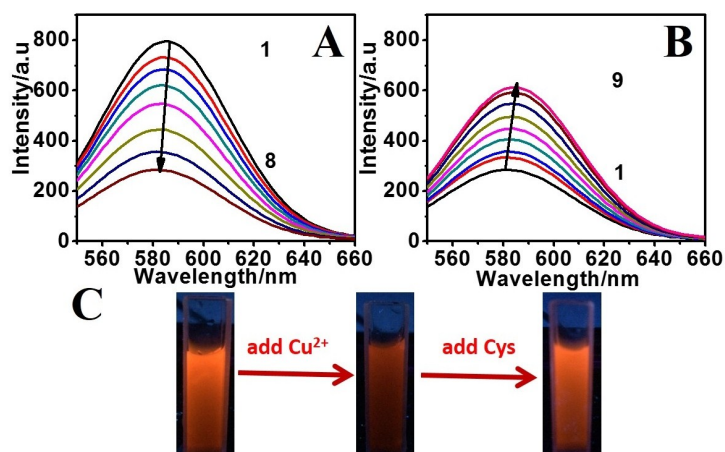

**Fig. S5** (A) Fluorescence spectra of NFR-Cu<sup>2+</sup> solution in Tris-HCl buffer of pH=6,  $C_{\text{NFR}}=1.0\times 10^{-4}$  M; The concentration of Cu<sup>2+</sup>: 0.0, 2.0, 4.0, 8.0, 12, 24, 48, 100 $\times 10^{-6}$  M; (B) Fluorescence spectra of NFR-Cu<sup>2+</sup> solution in the absence and presence of Cys in Tris-HCl buffer of pH=6. Cys (1-9): 0.0, 2.0, 4.0, 6.0, 8.0, 10.0, 12.0, 14.0, 20.0 $\times 10^{-4}$  M. All samples was tested with  $\lambda_{\text{ex}}=490$  nm, slit width of 5 nm; (C) The pure NFR solution, NFR-Cu<sup>2+</sup> solution and NFR-Cu<sup>2+</sup> solution in the presence of L-cysteine under 365 nm UV illumination.

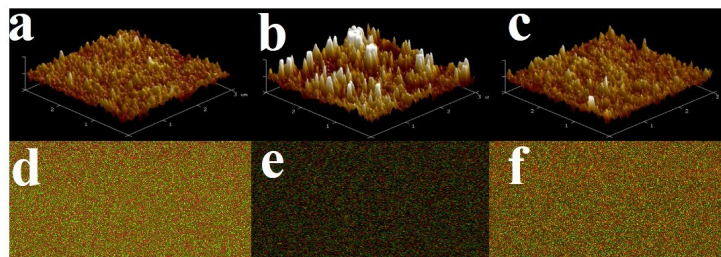

**Fig. S6** Tapping-mode AFM images of (a) (calcein@NFR/LDH)<sub>20</sub> UTFs, (b) (calcein@NFR/LDH)<sub>20</sub> UTFs after interaction with Cu<sup>2+</sup> and (c) UTFs-Cu<sup>2+</sup> complex after interaction with Cys; Confocal fluorescent microscopy images of (d) (calcein@NFR/LDH)<sub>20</sub> UTFs, (e) (calcein@NFR/LDH)<sub>20</sub> UTFs after interaction with Cu<sup>2+</sup> and (f) UTFs-Cu<sup>2+</sup> complex after interaction with Cys. (the concentration of Cu<sup>2+</sup> is 4.8×10<sup>-6</sup> M, Cys is 1.2×10<sup>-6</sup>M)

**Table S1** The fluorescence intensity changes of (calcein@NFR/LDH)<sub>20</sub> UTF-Cu<sup>2+</sup> system upon addition of Cys, Hcy, GSH and Na<sub>2</sub>S.

| Substances        | F/F <sub>0</sub> (520nm) | F/F <sub>0</sub> (607nm) |
|-------------------|--------------------------|--------------------------|
| Cys               | 2.30                     | 4.89                     |
| Hcy               | 1.62                     | 2.47                     |
| GSH               | 1.48                     | 2.35                     |
| Na <sub>2</sub> S | 1.35                     | 1.52                     |
